# Supplementary material
Source: Springer Nature journal article supplement (https://www.springermedizin.de/resource/supplementary/13024_2012_335_MOESM1_ESM.pdf/9643754)

A.

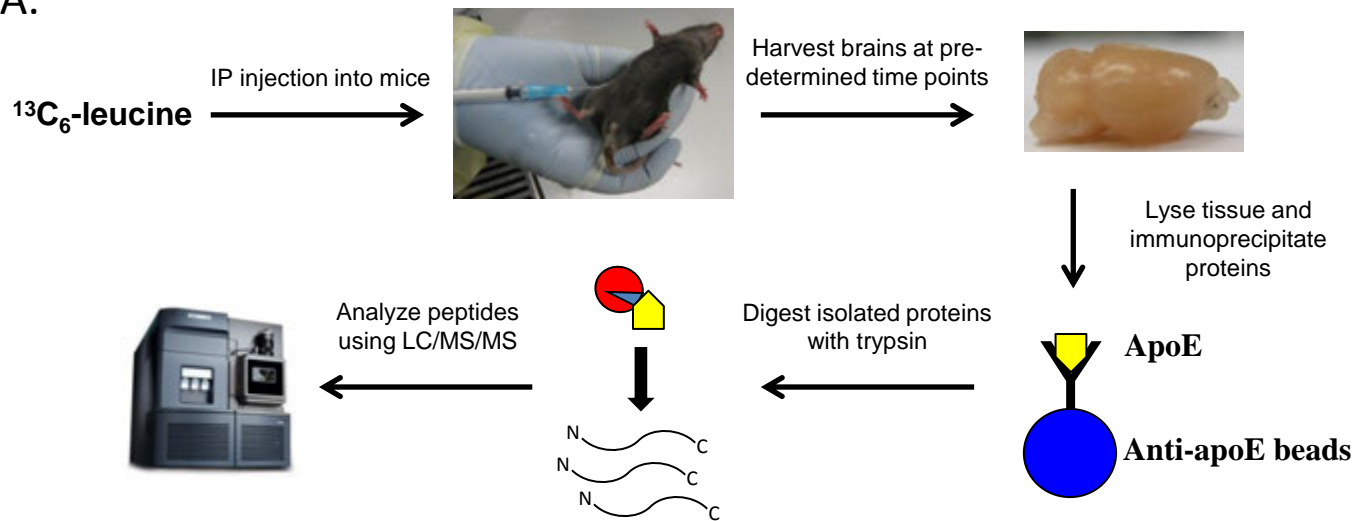

B.

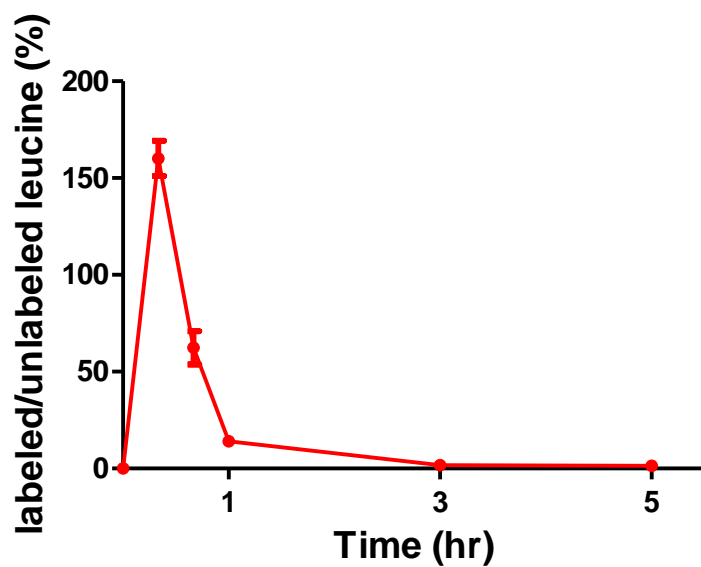

Supplement: MOESM1 [file 9643754]
